# Supplementary material for: Comparative Evaluation of Semi-Empirical Approaches to Retrieve Satellite-Derived Chlorophyll-a Concentrations from Nearshore and Offshore Waters of a Large Lake (Lake Ontario)
Source: MDPI journal article supplement (doi:10.3390/rs16091595), 2024-04-30
Supplement: s1 [file s1]

## Supplementary Materials

This section provides supplementary visualizations related to the data and results. The scatter plot in **Error! Reference source not found.** illustrates the temporal distribution of in-situ Chl-*a* matchups, colour-coded based on corresponding satellite imagery. **Error! Reference source not found.** displays a heatmap emphasizing the significance of each scheme in each data category with respect to in-situ Chl-*a* concentrations, with colour variations representing different  $R^2$  performances. Three tables are also presented in this section.

offers quantitative details of the in-situ data utilized, while **Error! Reference source not found.** describes each of the atmospheric correction processors employed. **Error! Reference source not found.** delivers a comprehensive description of the RS-derived Chl-*a* models developed, along with their performance metrics.

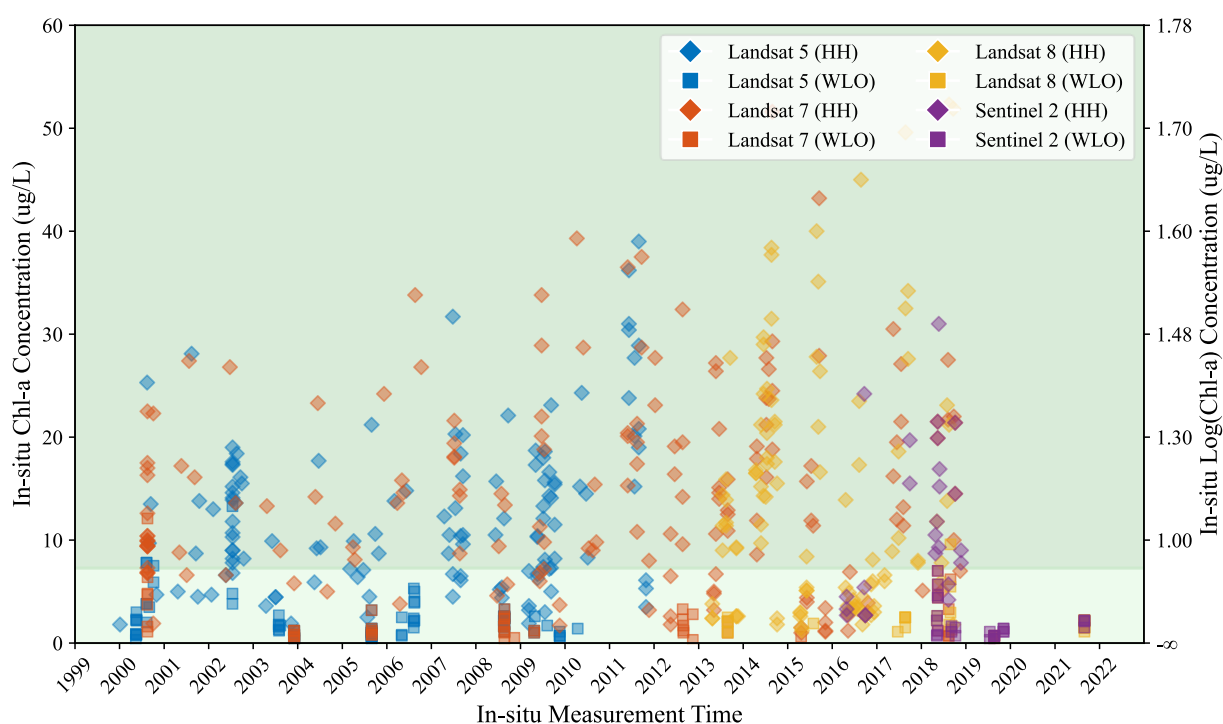

**Figure S** Time series plot of in-situ data, displaying Hamilton Harbour (HH, diamond markers) and Western Lake Ontario (WLO, square markers) alongside Landsat 5 (blue), 7 (red), 8 (yellow), and Sentinel-2 (purple) matchups. The green background represents classes of oligotrophic/mesotrophic and eutrophic/hypereutrophic based on Carlson's Trophic State Index (TSI). Two outlier concentrations of 137 and 80  $\mu\text{g/L}$  are excluded for better visual presentation.

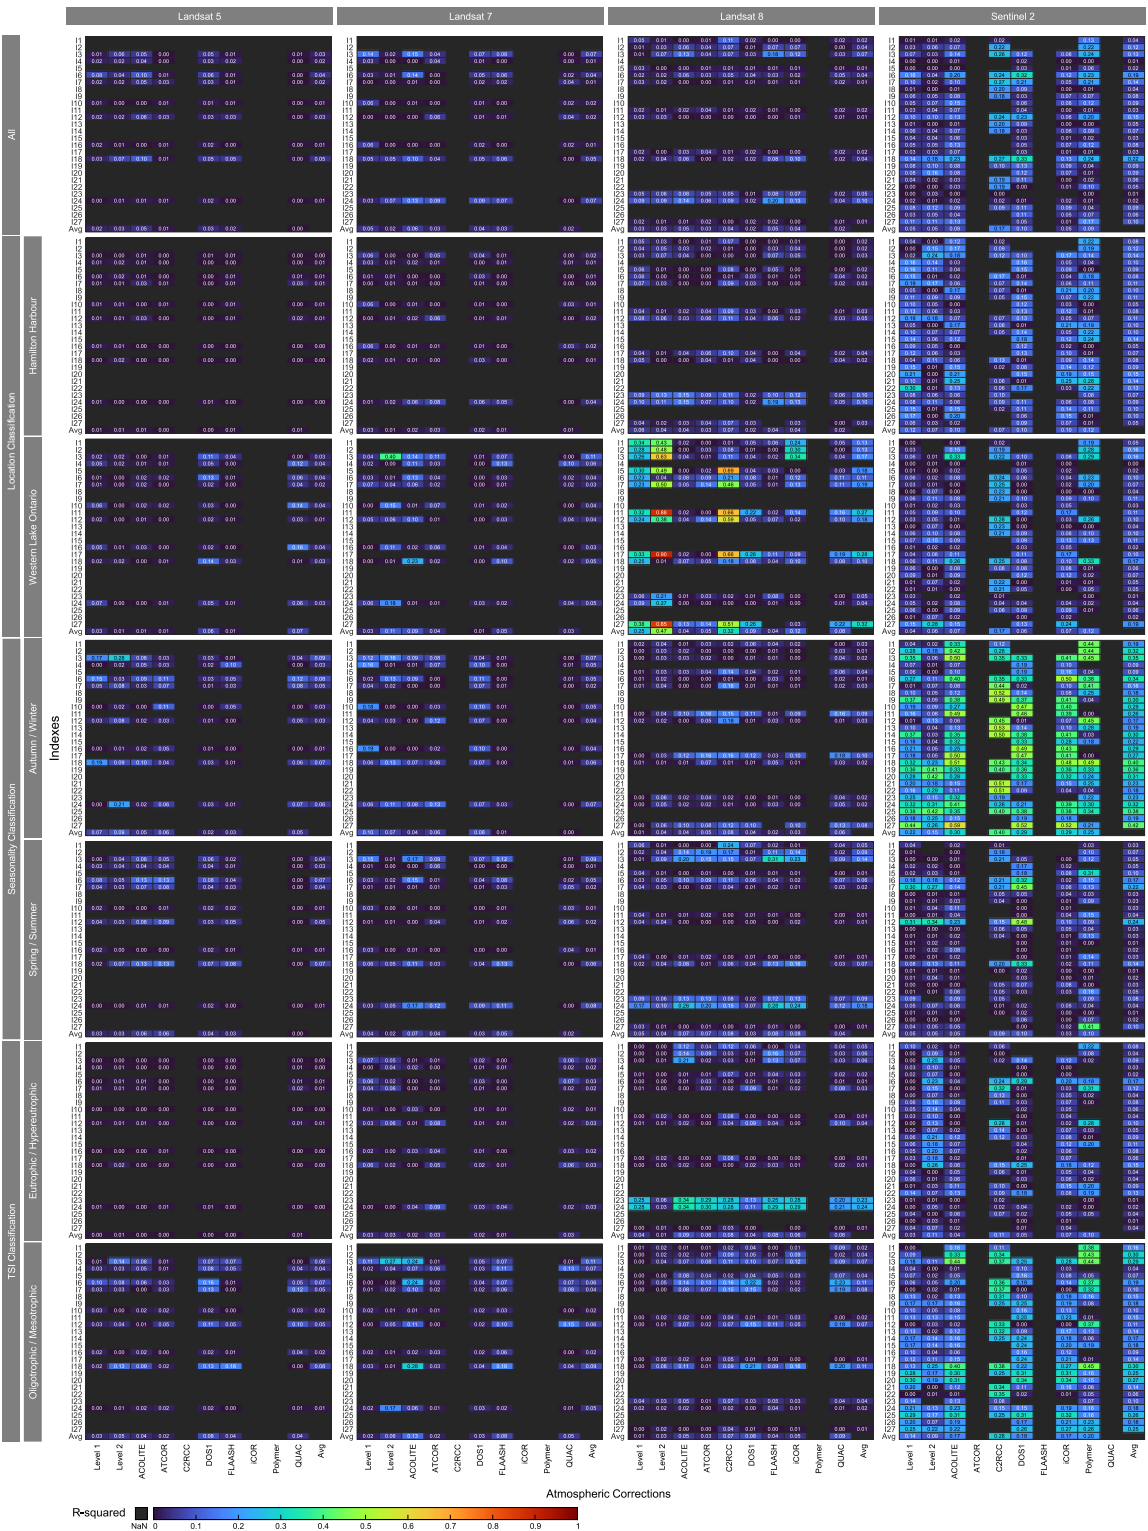

**Figure S**Heatmaps of  $R^2$  between in-situ Chl-a concentrations and corresponding index values of co-located pixels across various schemes and subcategories. Warmer colours indicate higher  $R^2$  (better performance), while colder ones signify lower  $R^2$ . Black cells indicate N/A values.

**Table S**Descriptive statistics of the in-situ data categorized based on seasonality, study location and Carlson's Trophic State Index (TSI).

| Location Category | Seasonality Category | TSI Category |
|-------------------|----------------------|--------------|
|-------------------|----------------------|--------------|

|                       | All   | HH    | WLO  | Autumn/<br>Winter | Spring/Su<br>mmer | Oligotrophic/M<br>esotrophic | Eutrophic/Hyper<br>eutrophic |
|-----------------------|-------|-------|------|-------------------|-------------------|------------------------------|------------------------------|
| Count or 'n'          | 600   | 410   | 190  | 132               | 468               | 305                          | 295                          |
| Frequency (%)         | 100 % | 68%   | 32%  | 22%               | 78%               | 51%                          | 49%                          |
| Mean (µg/L)           | 10.5  | 14.3  | 2.2  | 9.6               | 10.7              | 2.9                          | 18.3                         |
| Std. Deviation (µg/L) | 11.3  | 11.8  | 2.0  | 10.0              | 11.7              | 1.9                          | 11.6                         |
| Minimum (µg/L)        | 0.2   | 1.0   | 0.2  | 0.2               | 0.3               | 0.2                          | 7.3                          |
| Maximum (µg/L)        | 137.0 | 137.0 | 13.3 | 51.9              | 137.0             | 7.2                          | 137.0                        |

**Table S** Atmospheric correction processors utilized in this study. Level-2 products of Landsat 5 and 7 (LEDAPS- and LaSRC-corrected) are readily available for download, therefore excluded from the table below.

| Name    | Supported Sensors* | Input Products                               | Output Products                                                                                                                                                                                                   | Processing Environment                                                        | Pros                                                                                                                                        | Cons                                                            | Main Application         | Processing Speed                                  | Latest Version (Release Year) | Key References |
|---------|--------------------|----------------------------------------------|-------------------------------------------------------------------------------------------------------------------------------------------------------------------------------------------------------------------|-------------------------------------------------------------------------------|---------------------------------------------------------------------------------------------------------------------------------------------|-----------------------------------------------------------------|--------------------------|---------------------------------------------------|-------------------------------|----------------|
| ACOLITE | TM, ETM+, OLI, MSI | DN, TOA reflectance and ancillary data       | TOA reflectance, surface level reflectance, normalized water-leaving reflectance, Rayleigh corrected reflectance, remote sensing reflectance, TSM concentration, turbidity, Chl- <i>a</i> concentration, and more | Python Graphical User Interface (GUI) and Python Command Line Interface (CLI) | Freely available, supports many sensors, flexible and customizable, user-friendly, glint correction, masking, Q/A forum support, batch mode | Limited to the processing of coastal and inland water           | Aquatic                  | Moderate/Slow (depending on the selected outputs) | 20221114.0 (2022)             | [1,2]          |
| ATCOR 3 | TM, ETM+, OLI, MSI | DN, TOA reflectance, DEMs and ancillary data | TOA reflectance, ground reflectance, surface temperature, water vapour map                                                                                                                                        | Geomatica (CATALYST), IDL, and Python                                         | Supports many sensors, flexible and customizable, haze removal, topographic correction, cirrus removal, batch mode                          | Commercial, manual parameter selection and adjustment           | Land, coastal, and water | Fast                                              | 9.4.0 (2022)                  | [3,4]          |
| C2RCC   | OLI, MSI           | TOA reflectance and ancillary data           | Surface reflectance, normalized water-leaving reflectance ( $\rho_{wn}$ ), Chl- <i>a</i> concentration, TSM concentration                                                                                         | Plugin to the ESA SNAP                                                        | Freely available, designed for water, open-source code, based on machine learning and neural                                                | Limited to a few sensors, unsuitable for non-water applications | Coastal and inland water | Moderate (depending on the selected outputs)      | -                             | [5,6]          |

|                                  |                    |                                                  |                                                                                                   |                                                                |                                                                                                                                                                 |                                                                           |                          |          |                |         |
|----------------------------------|--------------------|--------------------------------------------------|---------------------------------------------------------------------------------------------------|----------------------------------------------------------------|-----------------------------------------------------------------------------------------------------------------------------------------------------------------|---------------------------------------------------------------------------|--------------------------|----------|----------------|---------|
|                                  |                    |                                                  | and their related uncertainties and more                                                          |                                                                | network, correction for many factors (gaseous absorption, air pressure, etc.)                                                                                   |                                                                           |                          |          |                |         |
| DOS1                             | TM, ETM+, OLI, MSI | DN, TOA Reflectance                              | Surface reflectance                                                                               | Plugin to the QGIS (Semi-Automatic Classification Plugin, SCP) | Freely available, easy to implement, suitable for a wide range of sensors, open source                                                                          | Simplifying assumptions, less accurate for complex atmospheric conditions | Land, coastal, and water | Fast     | 7.10.11 (2023) | [7,8]   |
| FLAASH                           | TM, ETM+, OLI      | Radiance in BIL or BIP format and ancillary data | Apparent reflectance (upscaled to 10,000), water vapour, cloud map (only for hyperspectral input) | Plugin to the ENVI, stand-alone C++ module                     | Reliable, supports a wide range of sensors, available for multispectral and hyperspectral sensors, water and aerosol retrieval and cloud masking                | Commercial, manual parameter selection and adjustment                     | Land, coastal, and water | Slow     | 4.7 (2009)     | [9,10]  |
| iCOR (previously known as OPERA) | OLI, MSI           | TOA reflectance                                  | BOA reflectance                                                                                   | Plugin to the ESA SNAP                                         | Freely available (basic version), generic, requires few input parameters, available for spaceborne, airborne and drone images, correction for adjacency effects | Limited sensor support, limited output products                           | Land, coastal, and water | Moderate | 3.0.0          | [11,12] |
| Polymer                          | MSI                | TOA reflectance and ancillary data               | Water reflectance and more                                                                        | Python CLI                                                     | Freely Available Flexible and robust, Q/A forum support, correction for sunglint, batch mode, land mask, cloud mask                                             | Unsuitable for non-water applications, user-unfriendly                    | Water                    | Moderate | 4.16 (2023)    | [13,14] |
| QUAC                             | TM, ETM+, OLI      | DN, apparent reflectance or radiance             | Apparent reflectance (upscaled to 10,000)                                                         | Plugin to the ENVI, stand-alone C++ module                     | Easy to use, supports a wide range of sensors, does not require ancillary data, does not require knowledge of sensor                                            | Commercial, less accurate, unsuitable for water-only scenes               | Land, coastal, and water | Fast     | -              | [15]    |

|         |     |                                                |                    |                                                |                                                                                                                                                                                                                                                            |                   |                                |          |                   |         |
|---------|-----|------------------------------------------------|--------------------|------------------------------------------------|------------------------------------------------------------------------------------------------------------------------------------------------------------------------------------------------------------------------------------------------------------|-------------------|--------------------------------|----------|-------------------|---------|
| Sen2Cor | MSI | TOA<br>reflectance<br>and<br>ancillary<br>data | BOA<br>reflectance | Plugin to the<br>ESA SNAP<br>and Python<br>CLI | metadata,<br>available for<br>hyperspectral<br>and<br>multispectral<br>imagery                                                                                                                                                                             | Limited to<br>MSI | Land,<br>coastal, and<br>water | Moderate | 2.11.00<br>(2022) | [16,17] |
|         |     |                                                |                    |                                                | Freely<br>available,<br>reliable for<br>MSI,<br>correction for<br>terrain and<br>cirrus, and<br>aerosol<br>optical<br>thickness,<br>water vapour,<br>scene<br>classification<br>map and<br>quality<br>indicators for<br>cloud and<br>snow<br>probabilities |                   |                                |          |                   |         |

\* Only limited to the list of sensors used in this study. Abbreviations in alphabetical order: BOA: Bottom-of-Atmosphere, DN: Digital Number, TOA: Top-of-Atmosphere.

**Table S** Summary of RS-derived Chl-a models across satellites and data categories. L5 = Landsat 5, L7 = Landsat 7, L8 = Landsat 8 and S2 = Sentinel-2.

| Model                     | AC               | RS-Derived Chl-a                                    | n   | RMSE<br>(µg/L) | RMSLE | Bias | MAE  | MAPE<br>(%) | MDAPE<br>(%) | ε<br>(%) | β<br>(%) | R <sup>2</sup> |
|---------------------------|------------------|-----------------------------------------------------|-----|----------------|-------|------|------|-------------|--------------|----------|----------|----------------|
| <i>M<sub>L5-All</sub></i> | ACOLITE          | Chl <sub>aRS</sub> = -14.00×I <sub>18</sub> + 11.85 | 201 | 11.25          | 0.41  | 1.53 | 2.12 | 139.00      | 59.80        | 87.45    | 39.15    | 0.35           |
| <i>M<sub>L5-HH</sub></i>  | QUAC             | Chl <sub>aRS</sub> = 4.90×I <sub>7</sub> + 5.47     | 123 | 13.23          | 0.31  | 1.25 | 1.74 | 84.13       | 41.30        | 54.46    | 24.94    | 0.01           |
| <i>M<sub>L5-WLO</sub></i> | QUAC             | Chl <sub>aRS</sub> = 1.03×I <sub>4</sub> + 1.59     | 82  | 1.82           | 0.21  | 1.02 | 1.43 | 36.10       | 26.69        | 28.86    | 12.31    | 0.19           |
| <i>M<sub>L5-AW</sub></i>  | Level-2 (LEDAPS) | Chl <sub>aRS</sub> = -25.20×I <sub>3</sub> + 31.74  | 42  | 5.35           | 0.39  | 1.35 | 2.08 | 123.11      | 51.80        | 94.68    | 25.01    | 0.30           |
| <i>M<sub>L5-SS</sub></i>  | ATCOR            | Chl <sub>aRS</sub> = -19.68×I <sub>18</sub> + 14.74 | 161 | 12.15          | 0.39  | 1.44 | 1.99 | 126.12      | 50.65        | 73.14    | 33.14    | 0.38           |
| <i>M<sub>L5-EH</sub></i>  | QUAC             | Chl <sub>aRS</sub> = 11.55×I <sub>12</sub> + 13.89  | 93  | 14.12          | 0.21  | 1.15 | 1.46 | 43.68       | 37.41        | 41.45    | 12.30    | 0.00           |
| <i>M<sub>L5-OM</sub></i>  | DOS1             | Chl <sub>aRS</sub> = -2.48×I <sub>6</sub> + 7.53    | 112 | 1.68           | 0.22  | 1.08 | 1.54 | 48.03       | 42.24        | 56.64    | 12.38    | 0.25           |
| <i>M<sub>L7-All</sub></i> | Level-2 (LEDAPS) | Chl <sub>aRS</sub> = -15.52×I <sub>3</sub> + 26.41  | 216 | 9.64           | 0.49  | 1.56 | 2.48 | 202.12      | 61.20        | 107.78   | 24.78    | 0.10           |
| <i>M<sub>L7-HH</sub></i>  | ACOLITE          | Chl <sub>aRS</sub> = 500.40×I <sub>24</sub> + 10.26 | 160 | 8.99           | 0.35  | 1.26 | 1.80 | 109.47      | 41.75        | 52.45    | 10.17    | 0.04           |
| <i>M<sub>L7-WLO</sub></i> | Level-2 (LEDAPS) | Chl <sub>aRS</sub> = -19.41×I <sub>3</sub> + 21.53  | 57  | 1.51           | 0.20  | 1.02 | 1.47 | 40.61       | 34.53        | 38.17    | 11.35    | 0.38           |
| <i>M<sub>L7-AW</sub></i>  | Level-1          | Chl <sub>aRS</sub> = -47.12×I <sub>4</sub> + 28.64  | 39  | 10.12          | 0.52  | 1.72 | 2.68 | 210.25      | 69.72        | 189.76   | 59.91    | 0.19           |
| <i>M<sub>L7-SS</sub></i>  | Level-2 (LEDAPS) | Chl <sub>aRS</sub> = -10.74×I <sub>3</sub> + 22.04  | 178 | 9.33           | 0.48  | 1.51 | 2.35 | 192.44      | 56.90        | 83.35    | 22.78    | 0.07           |
| <i>M<sub>L7-EH</sub></i>  | ATCOR            | Chl <sub>aRS</sub> = 0.01×I <sub>24</sub> + 17.57   | 122 | 7.75           | 0.18  | 1.08 | 1.42 | 38.36       | 31.73        | 40.00    | 9.08     | 0.08           |
| <i>M<sub>L7-OM</sub></i>  | Level-2 (LEDAPS) | Chl <sub>aRS</sub> = -15.79×I <sub>3</sub> + 18.52  | 94  | 1.69           | 0.24  | 1.11 | 1.62 | 57.22       | 45.48        | 63.44    | 15.65    | 0.30           |
| <i>M<sub>L8-All</sub></i> | FLAASH           | Chl <sub>aRS</sub> = 0.08×I <sub>24</sub> + 3.64    | 115 | 12.29          | 0.49  | 1.57 | 2.49 | 204.36      | 66.45        | 122.72   | 46.81    | 0.08           |
| <i>M<sub>L8-HH</sub></i>  | FLAASH           | Chl <sub>aRS</sub> = 0.08×I <sub>24</sub> + 5.66    | 96  | 12.67          | 0.44  | 1.44 | 2.21 | 167.45      | 60.91        | 100.66   | 26.44    | 0.08           |
| <i>M<sub>L8-WLO</sub></i> | Level-1          | Chl <sub>aRS</sub> = 23.72×I <sub>1</sub> - 24.32   | 24  | 1.39           | 0.18  | 1.13 | 1.39 | 38.71       | 25.19        | 31.38    | 14.02    | 0.39           |
| <i>M<sub>L8-AW</sub></i>  | C2RCC            | Chl <sub>aRS</sub> = 4.72×I <sub>7</sub> - 0.67     | 32  | 11.33          | 0.46  | 1.53 | 2.38 | 175.36      | 65.65        | 102.25   | 53.15    | 0.14           |
| <i>M<sub>L8-SS</sub></i>  | FLAASH           | Chl <sub>aRS</sub> = -27.09×I <sub>3</sub> + 36.80  | 93  | 11.72          | 0.45  | 1.46 | 2.15 | 161.20      | 64.74        | 103.30   | 36.31    | 0.23           |
| <i>M<sub>L8-EH</sub></i>  | ACOLITE          | Chl <sub>aRS</sub> = -41.56×I <sub>3</sub> + 53.14  | 62  | 11.58          | 0.21  | 1.15 | 1.49 | 49.88       | 39.97        | 45.99    | 13.32    | 0.26           |
| <i>M<sub>L8-OM</sub></i>  | QUAC             | Chl <sub>aRS</sub> = -0.80×I <sub>6</sub> + 4.22    | 63  | 1.25           | 0.18  | 1.08 | 1.41 | 39.04       | 32.75        | 39.32    | 10.32    | 0.24           |
| <i>M<sub>S2-All</sub></i> | DOS1             | Chl <sub>aRS</sub> = -17.38×I <sub>18</sub> + 9.50  | 51  | 6.19           | 0.38  | 1.36 | 2.00 | 119.66      | 54.24        | 76.54    | 39.85    | 0.36           |
| <i>M<sub>S2-HH</sub></i>  | Polymer          | Chl <sub>aRS</sub> = 27.64×I <sub>2</sub> - 0.14    | 24  | 6.97           | 0.31  | 1.24 | 1.79 | 85.43       | 44.74        | 68.26    | 15.53    | 0.16           |
| <i>M<sub>S2-WLO</sub></i> | ACOLITE          | Chl <sub>aRS</sub> = -5.84×I <sub>3</sub> + 7.99    | 27  | 1.10           | 0.17  | 1.03 | 1.36 | 35.05       | 24.10        | 28.30    | 0.85     | 0.37           |
| <i>M<sub>S2-AW</sub></i>  | ACOLITE          | Chl <sub>aRS</sub> = -17.57×I <sub>18</sub> + 15.51 | 18  | 5.95           | 0.37  | 1.30 | 1.68 | 117.28      | 26.20        | 35.50    | 10.84    | 0.49           |
| <i>M<sub>S2-SS</sub></i>  | DOS1             | Chl <sub>aRS</sub> = -57.12×I <sub>12</sub> + 12.11 | 33  | 5.11           | 0.37  | 1.16 | 2.04 | 105.54      | 58.21        | 104.07   | 2.28     | 0.32           |
| <i>M<sub>S2-EH</sub></i>  | DOS1             | Chl <sub>aRS</sub> = 22.01×I <sub>18</sub> + 17.93  | 16  | 5.50           | 0.15  | 1.06 | 1.32 | 29.56       | 22.51        | 24.37    | 13.08    | 0.32           |
| <i>M<sub>S2-OM</sub></i>  | ACOLITE          | Chl <sub>aRS</sub> = -5.01×I <sub>3</sub> + 7.08    | 35  | 1.16           | 0.16  | 1.03 | 1.36 | 33.36       | 28.22        | 36.06    | 5.66     | 0.52           |

## References

1. Vanhellemont, Q. Adaptation of the Dark Spectrum Fitting Atmospheric Correction for Aquatic Applications of the Landsat and Sentinel-2 Archives. *Remote Sens. Environ.* **2019**, *225*, 175–192, doi:10.1016/j.rse.2019.03.010.
2. Vanhellemont, Q.; Ruddick, K. Atmospheric Correction of Metre-Scale Optical Satellite Data for Inland and Coastal Water Applications. *Remote Sens. Environ.* **2018**, *216*, 586–597, doi:10.1016/j.rse.2018.07.015.
3. Richter, R.; Schlöpfer, D. Atmospheric/Topographic Correction for Satellite Imagery. In : DLR Report DLR-IB 565-02/DLR Rep. DLR-IB **2011**, *565*, 202.
4. Richter, R.; Schlöpfer, D.; Center, G.D.L.R. — G.A. Atmospheric/Topographic Correction for Satellite Imagery (ATCOR-2/3 User Guide, Version 8.2.1, February 2013). **2013**, *3*, 224.
5. Brockmann, C.; Doerffer, R.; Peters, M.; Stelzer, K.; Embacher, S.; Ruescas, A. Evolution of the C2RCC Neural Network for Sentinel 2 and 3 for the Retrieval of Ocean Colour Products in Normal and Extreme Optically Complex Waters. In Proceedings of the European Space Agency, (Special Publication) ESA SP; 2016; Vol. SP-740, p. 54.
6. Schiller, H.; Doerffer, R. Neural Network for Emulation of an Inverse Model Operational Derivation of Case II Water Properties from MERIS Data. *Int. J. Remote Sens.* **1999**, *20*, 1735–1746, doi:10.1080/014311699212443.
7. Congedo, L. Semi-Automatic Classification Plugin Semi-Automatic Classification Plugin Documentation. **2017**, *4*, 3–206.
8. Congedo, L. Semi-Automatic Classification Plugin: A Python Tool for the Download and Processing of Remote Sensing Images in QGIS. *J. Open Source Softw.* **2021**, *6*, 3172, doi:10.21105/joss.03172.
9. ENVI ENVI Atmospheric Correction Module: QUAC and FLAASH User's Guide. **2009**, *4*, 44.
10. Felde, G.W.; Anderson, G.P.; Cooley, T.W.; Matthew, M.W.; Adler-Golden, S.M.; Berk, A.; Lee, J. Analysis of Hyperion Data with the FLAASH Atmospheric Correction Algorithm. In Proceedings of the IGARSS 2003. 2003 IEEE International Geoscience and Remote Sensing Symposium. Proceedings (IEEE Cat. No.03CH37477); IEEE, 2003; Vol. 1, pp. 90–92.
11. De Keukelaere, L.; Sterckx, S.; Adriaensen, S.; Knaeps, E.; Reusen, I.; Giardino, C.; Bresciani, M.; Hunter, P.; Neil, C.; Van der Zande, D.; et al. Atmospheric Correction of Landsat-8/OLI and Sentinel-2/MSI Data Using ICOR Algorithm: Validation for Coastal and Inland Waters. *Eur. J. Remote Sens.* **2018**, *51*, 525–542, doi:10.1080/22797254.2018.1457937.
12. Wolters, E.; Toté, C.; Sterckx, S.; Adriaensen, S.; Henocq, C.; Bruniquel, J.; Scifoni, S.; Dransfeld, S. Icor Atmospheric Correction on Sentinel-3/OLCI over Land: Intercomparison with Aeronet, Radcalnet, and Syn Level-Remote Sens. **2021**, *13*, 1–26, doi:10.3390/rs13040654.
13. Steinmetz, F.; Deschamps, P.-Y.; Ramon, D. Atmospheric Correction in Presence of Sun Glint: Application to MERIS. *Opt. Express* **2011**, *19*, 9783, doi:10.1364/oe.19.009783.
14. Steinmetz, F.; Ramon, D. Sentinel-2 MSI and Sentinel-3 OLCI Consistent Ocean Colour Products Using POLYMER. In Proceedings of the Remote Sensing of the Open and Coastal Ocean and Inland Waters; Frouin, R.J., Murakami, H., Eds.; SPIE, October 30 2018; p. 13.
15. Bernstein, L.S. Quick Atmospheric Correction Code: Algorithm Description and Recent Upgrades. *Opt. Eng.* **2012**, *51*, 111719, doi:10.1117/1.oe.51.11.111719.
16. Main-Knorn, M.; Pflug, B.; Louis, J.; Debaecker, V.; Müller-Wilm, U.; Gascon, F. Sen2Cor for Sentinel-In Proceedings of the Image and Signal Processing for Remote Sensing XXIII; Bruzzone, L., Bovolo, F., Benediktsson, J.A., Eds.; SPIE, October 4 2017; Vol. 10427, p. 3.
17. Louis, J.; Debaecker, V.; Pflug, B.; Main-Knorn, M.; Bieniarz, J.; Mueller-Wilm, U.; Cadau, E.; Gascon, F. Sentinel-2 SEN2COR: L2A Processor for Users. In Proceedings of the European Space Agency, (Special Publication) ESA SP; 2016; Vol. SP-740, pp. 1–8.
